# Supplementary material for: Novel Cationic Prodrug of Ubiquinol-10 Enhances Intestinal Absorption via Efficient Formation of Nanosized Mixed-Micelles with Bile Acid Anions
Source: MDPI journal article supplement (doi:10.3390/molecules25030546), 2020-01-27
Supplement: s1 [file s1]

## Supplemental Figure S1

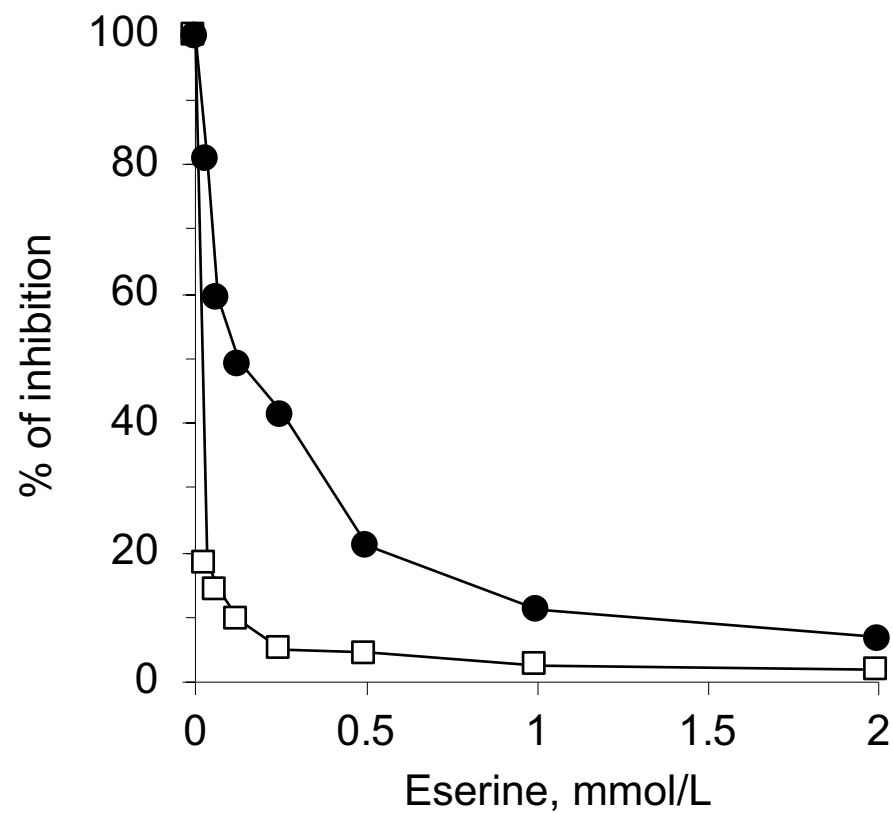

Figure S1. Effects of eserine on enzymatic hydrolysis of UqH-4-DMG by rat and human liver microsomes.  
(●), rat liver microsomes; (□), human liver microsomes.

Supplemental Figure S2

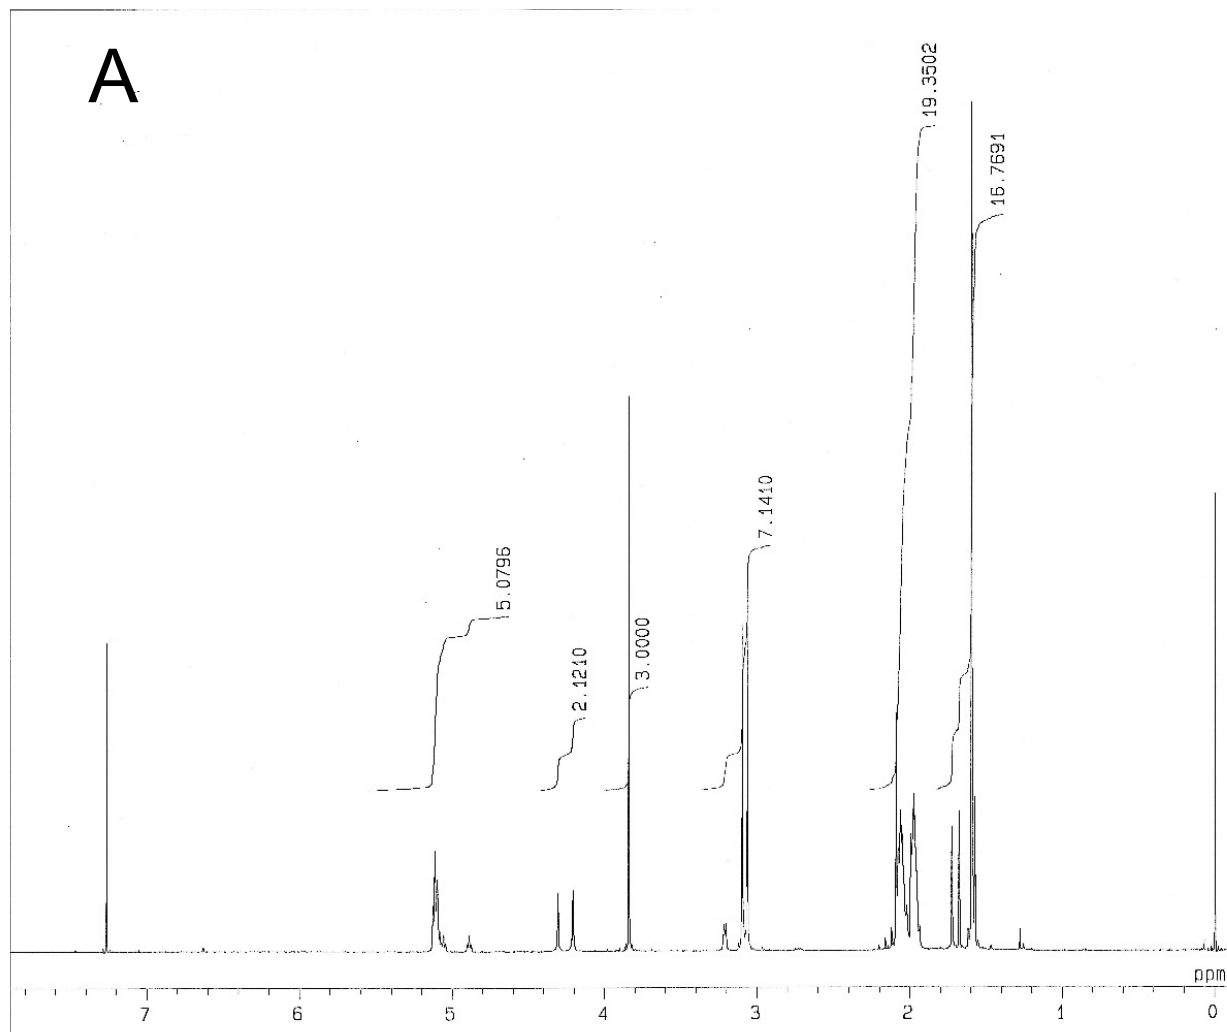

Supplemental Figure S2

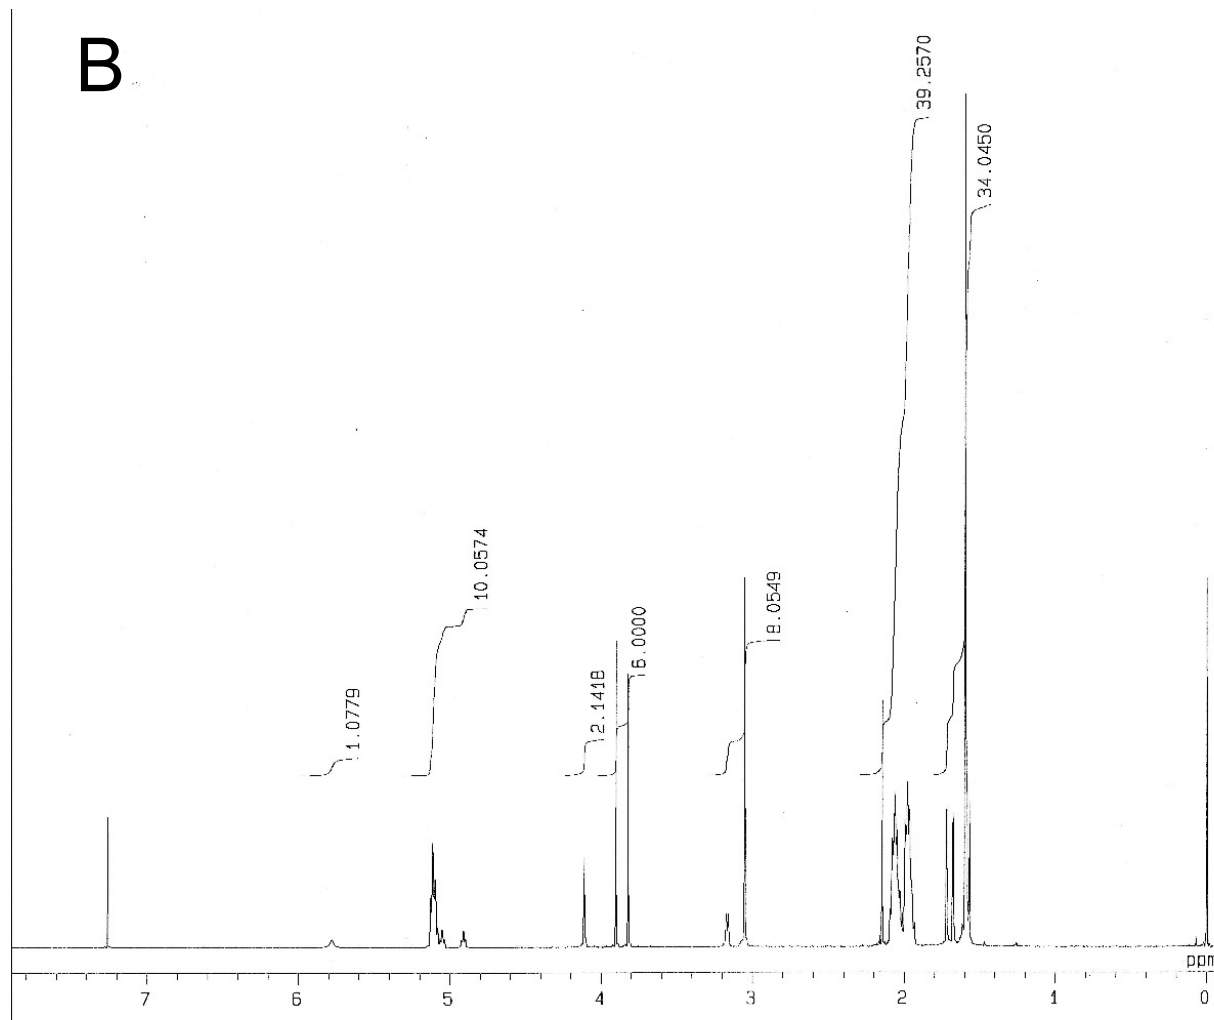

## Supplemental Figure S2

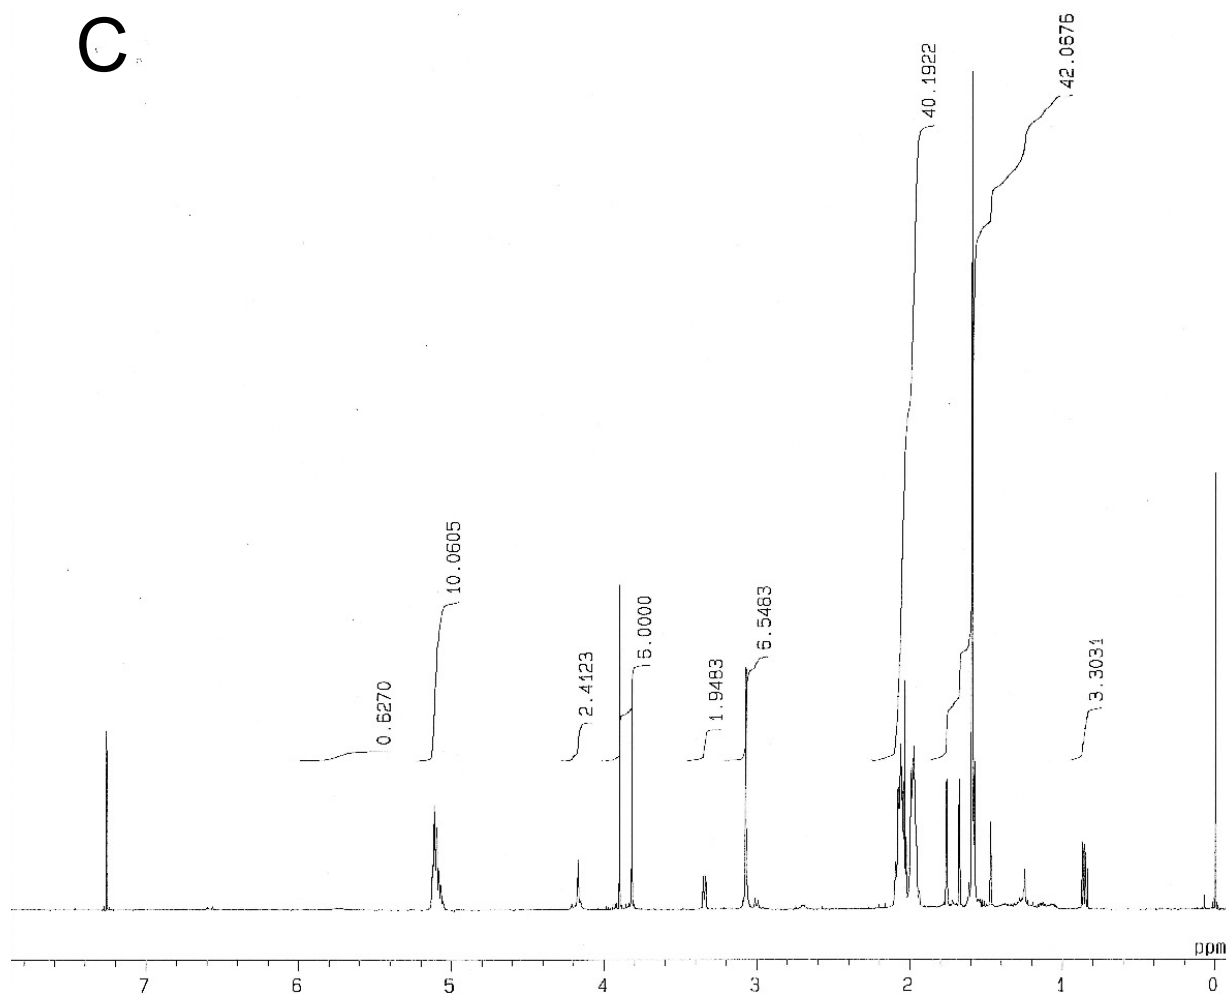

Figure S2. <sup>1</sup>H-NMR spectra of UqH-DMG (A), UqH-1-DMG (B) and UqH-4-DMG (C).

## Supplemental Figure S3

A

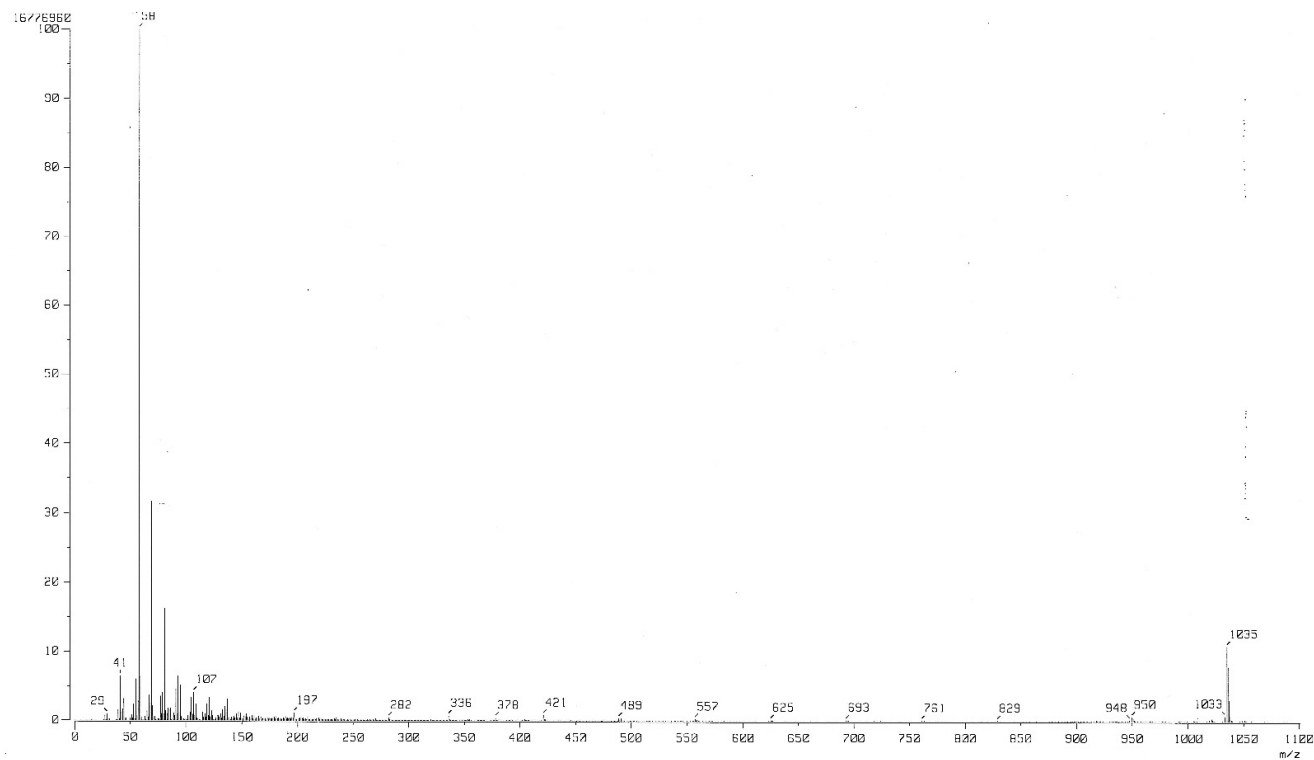

## Supplemental Figure S3

B

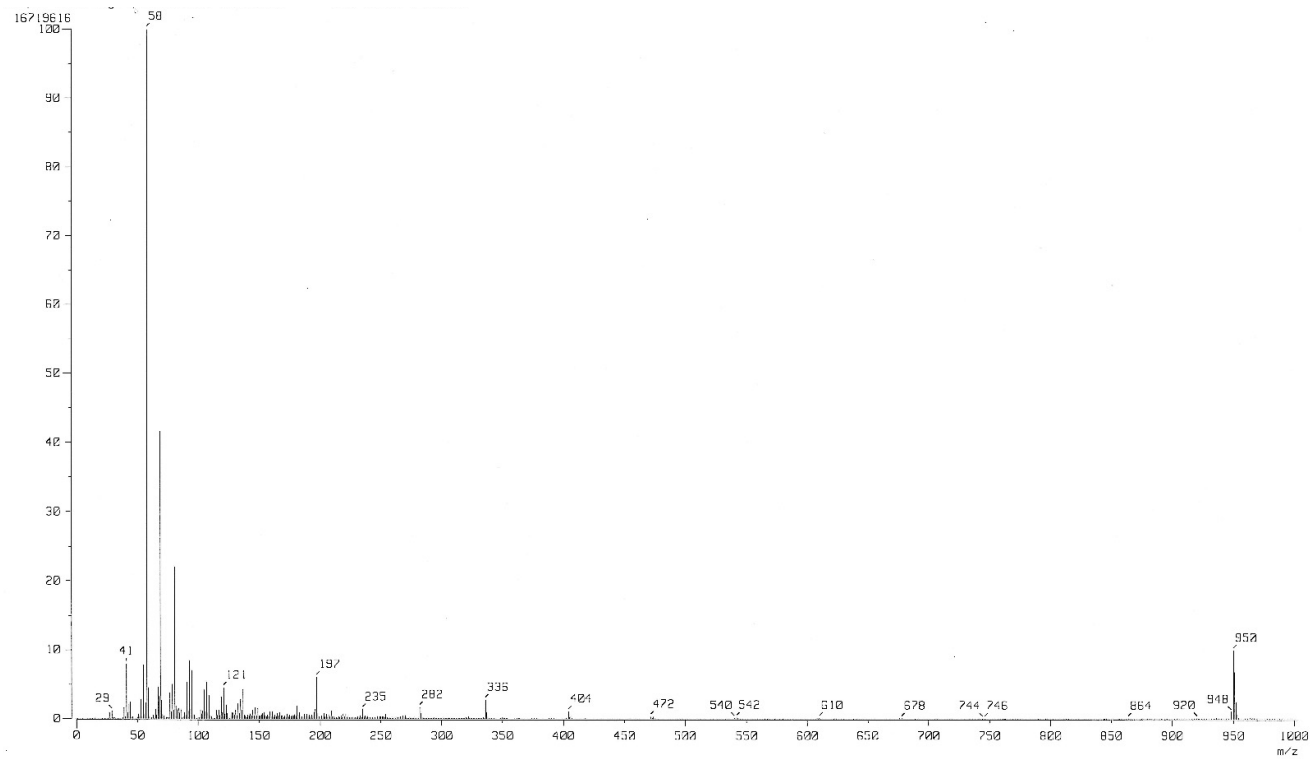

## Supplemental Figure S3

C

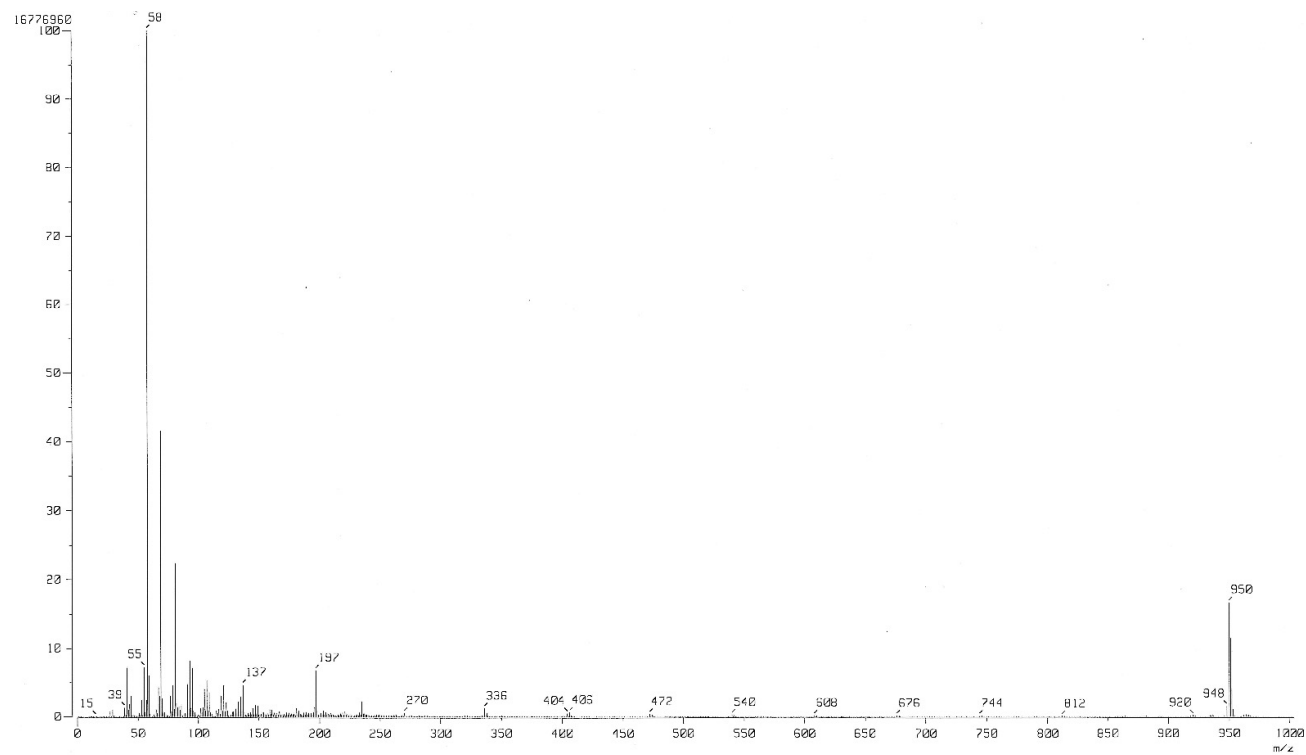

Figure S3. MS spectra of UqH-DMG (A), UqH-1-DMG (B) and UqH-4-DMG (C).
